# Supplementary figures and images for: Synthesis and biological assessment of chalcone and pyrazoline derivatives as novel inhibitor for ELF3-MED23 interaction
Source: eLife journal article supplement (doi:10.7554/elife.97051), 2024-06-03

## Source Data 2

Uncropped blot images of Figure 3C

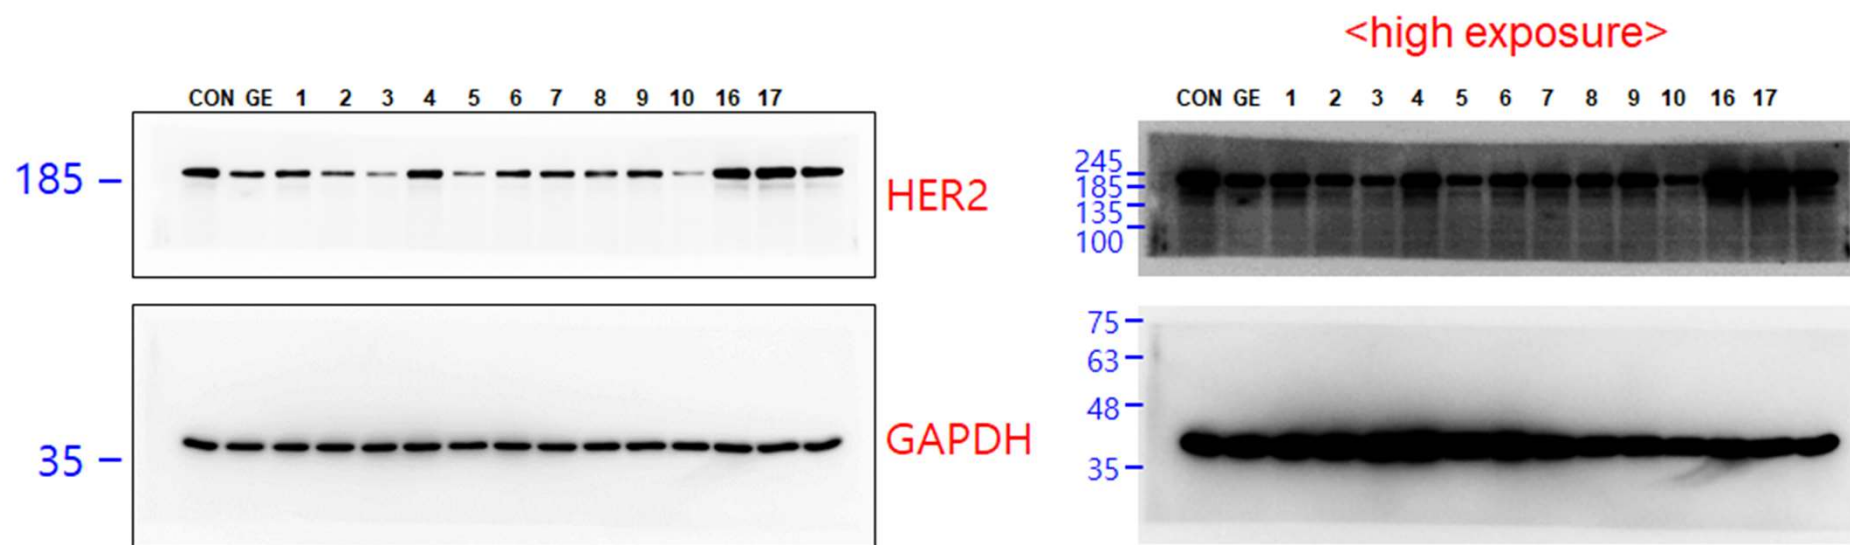

Supplement: fig3-data2 [file elife-97051-fig3-data2-v1.zip]

## Source Data 2

### Uncropped blot images of Figure 3E

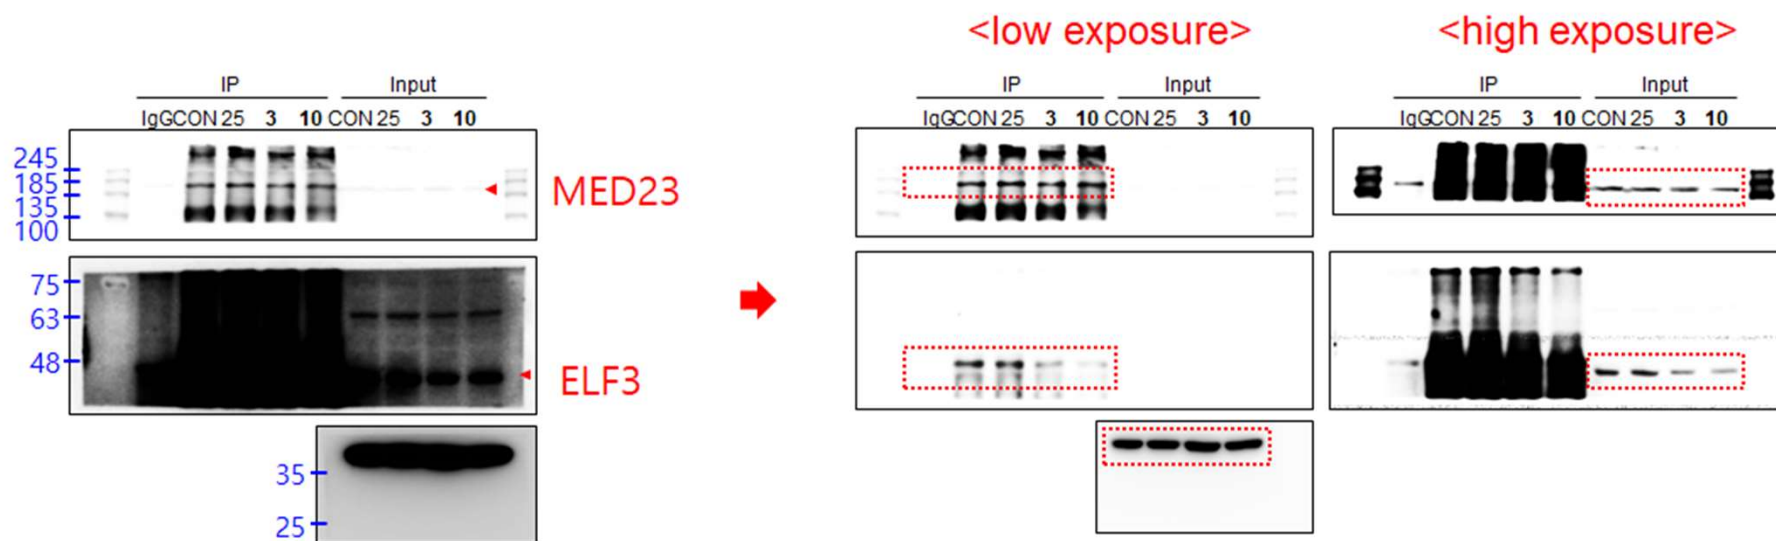

Supplement: fig3-data4 [file elife-97051-fig3-data4-v1.zip]

Source Data 2

Uncropped blot images of Figure 5C

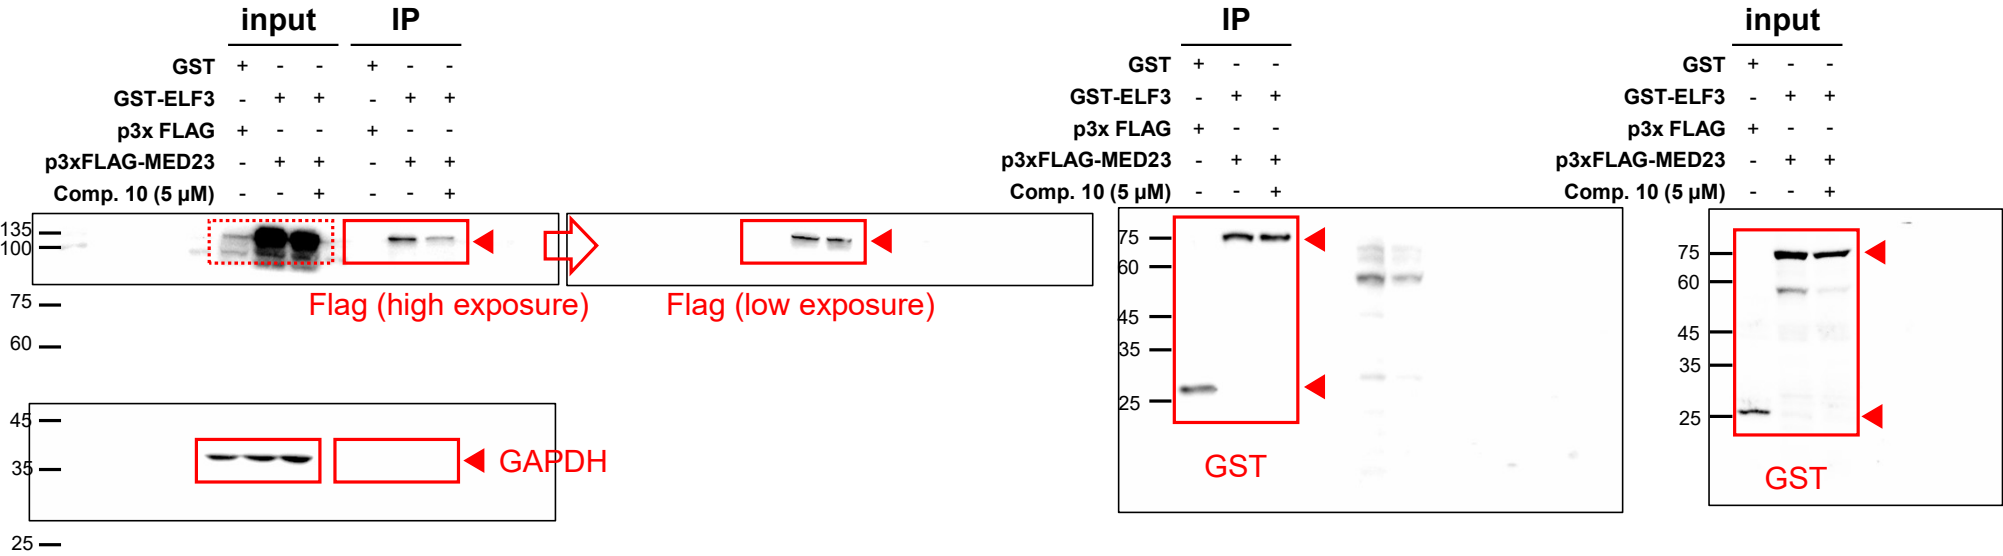

Supplement: fig5-data2 [file elife-97051-fig5-data2-v1.zip]

## Source Data 2

### Uncropped blot images of Figure 5F

*upper*

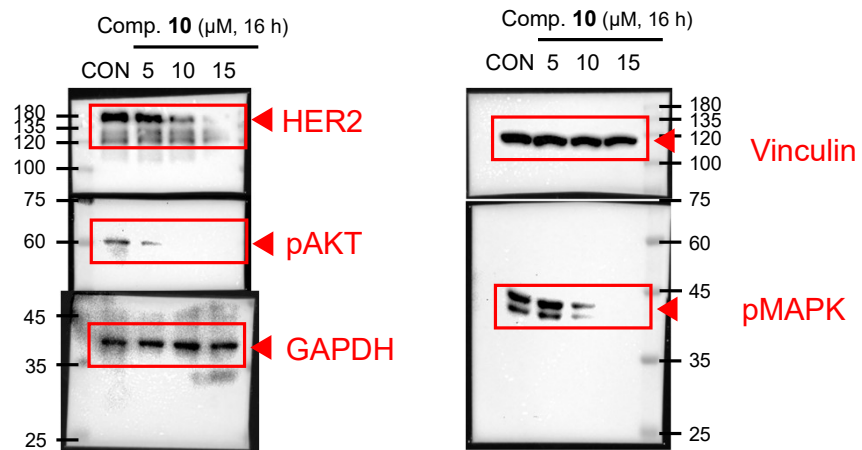

*lower*

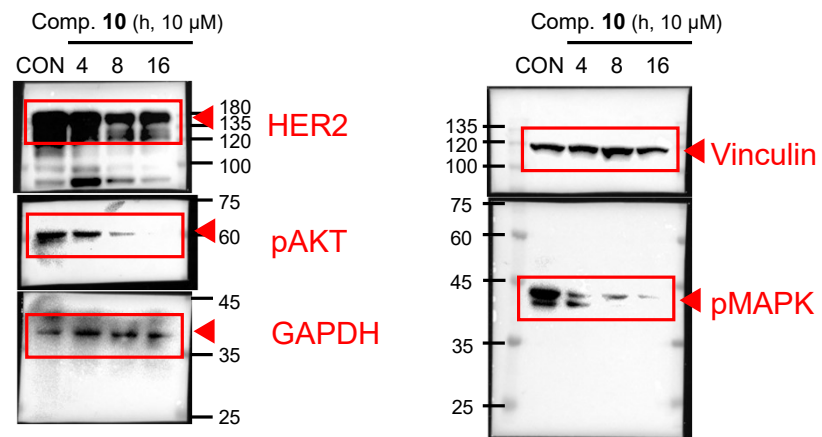

Supplement: fig5-data4 [file elife-97051-fig5-data4-v1.zip]

## Source Data 2

### Uncropped blot images of Figure 6B

*upper*

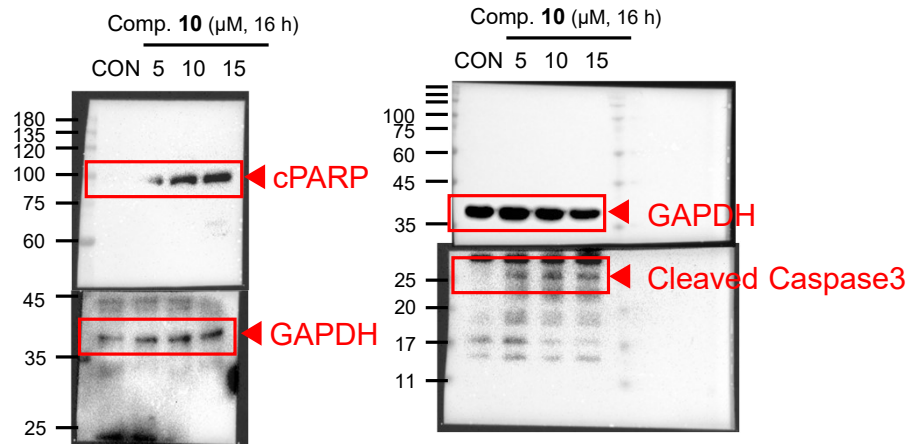

*lower*

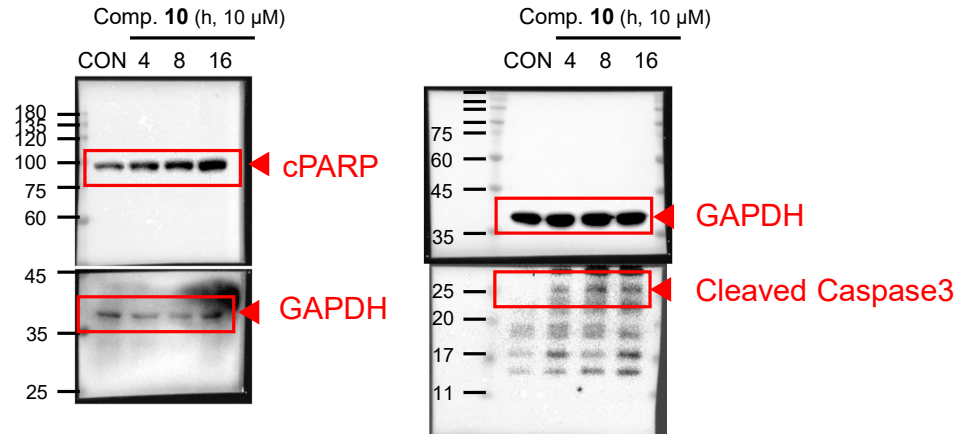

Supplement: fig6-data2 [file elife-97051-fig6-data2-v1.zip]

## Source Data 2

### Uncropped blot images of Figure 7B

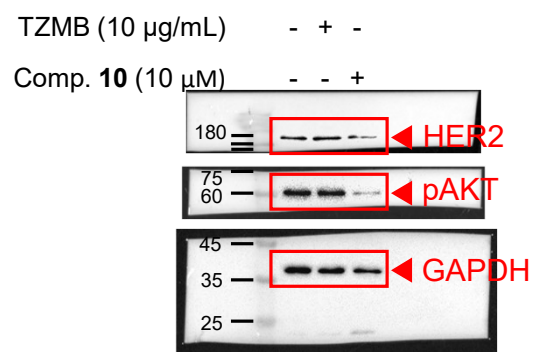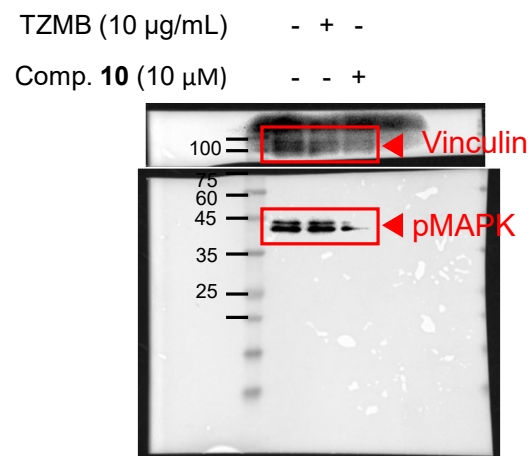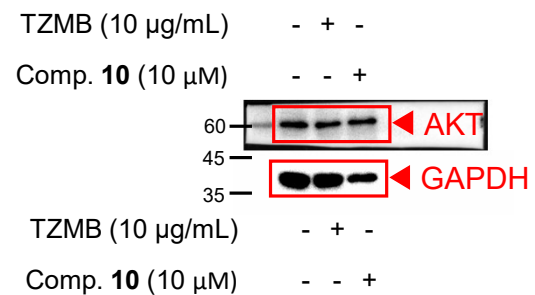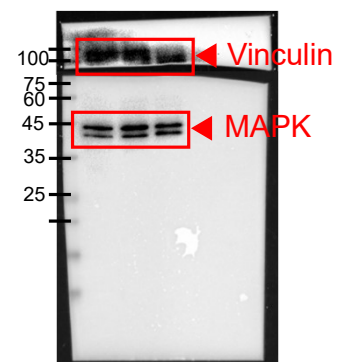

Supplement: fig7-data2 [file elife-97051-fig7-data2-v1.zip]
